# Supplementary material for: An electrochemical microfluidic device for non-enzymatic cholesterol determination using a lab-made disposable electrode
Source: Royal Society of Chemistry journal article supplement (doi:10.1039/d3ay00654a), 2023-01-01
Supplement: d3ay00654a1.pdf [file d3ay00654a1.pdf]

## SUPPLEMENTARY MATERIAL

### **Electrochemical Microfluidic Device for Non-Enzymatic Cholesterol determination using a Lab-made Disposable Electrode**

Emily Yamagutti Watanabe<sup>1</sup>, Ava Gevaerd<sup>1,2</sup>, Fabio Roberto Caetano<sup>1</sup>,

Luiz Humberto Marcolino-Junior<sup>1\*</sup>, Márcio Fernando Bergamini<sup>1\*\*</sup>

*<sup>1</sup>Laboratório de Sensores Eletroquímicos (LabSensE) – Departamento de Química, Universidade Federal do Paraná (UFPR), CEP 81531-980, Curitiba, PR, Brazil.*

*<sup>2</sup>Hilab, Rua José Altair Possebom, 800, CEP 81270-185, Curitiba, PR, Brazil.*

Corresponding Authors:

\*LHM ([luiz1berto@ufpr.br](mailto:luiz1berto@ufpr.br))

\*\*MFB ([bergamini@ufpr.br](mailto:bergamini@ufpr.br))

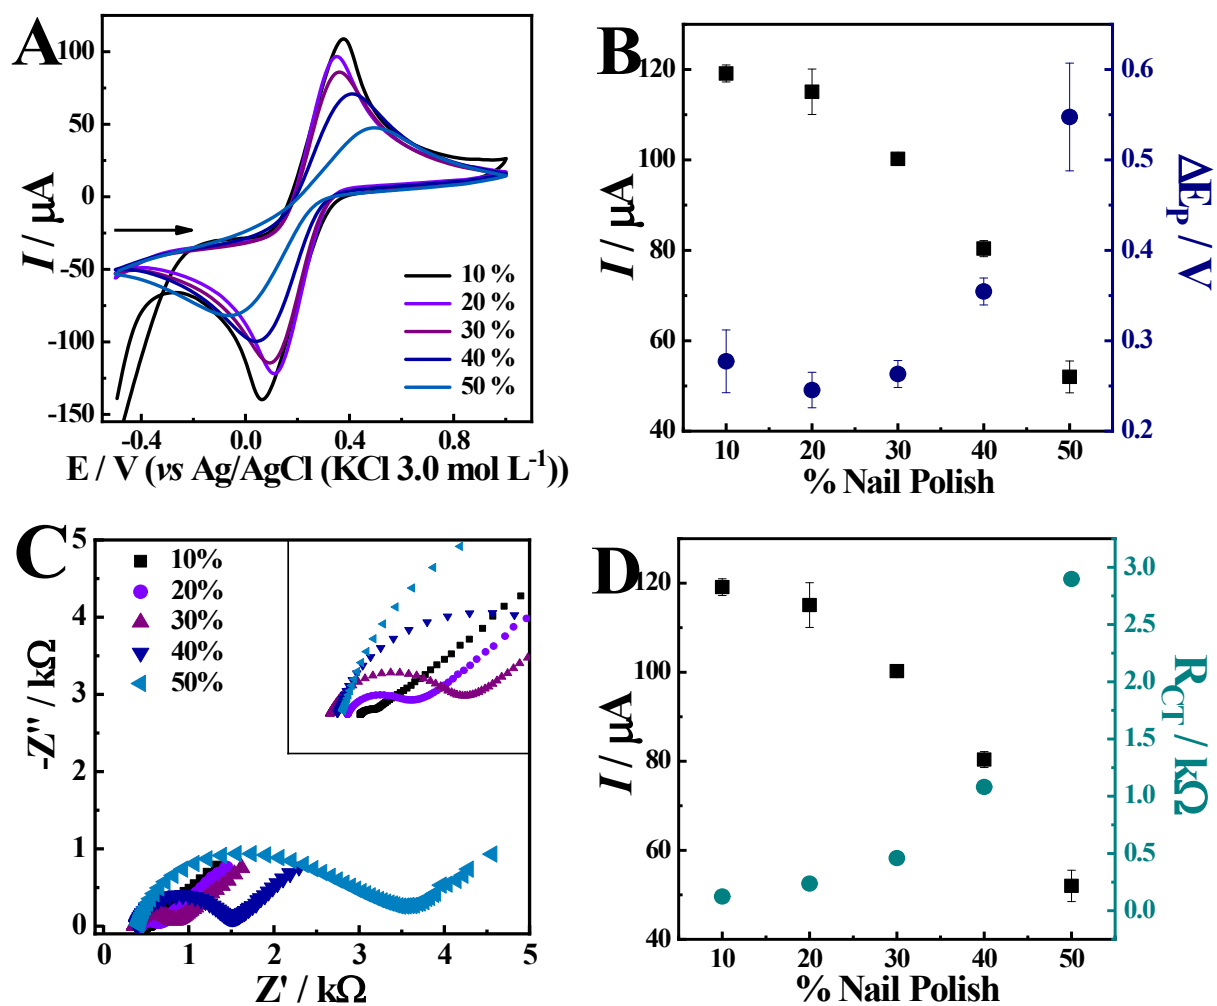

Figure S1

**Figure S1:** A) Cyclic voltammograms of DunkE covered with different percentages composition of graphite and nail polish (10% to 50%; containing 5 layers of deposited ink), performed in presence of  $5.0 \text{ mmol L}^{-1} [\text{Fe}(\text{CN})_6]^{4-}$  in KCl pH 3.0 at  $100 \text{ mV s}^{-1}$ . B) Relation of anodic peak current and the variation between peak potential ( $\Delta E$ ) as function of increase of nail polish at conductive ink composition obtained. C) EIS profile of DunkE covered with different percentages of graphite and nail polish (10% to 50%), performed in presence of  $5,0 \text{ mmol L}^{-1} [\text{Fe}(\text{CN})_6]^{4-}$  in KCl pH 3.0 from 100 kHz to 1 MHz. D) Anodic peak current and charge transfer resistance as function of nail polish content in conductive ink composition.



Figure S2

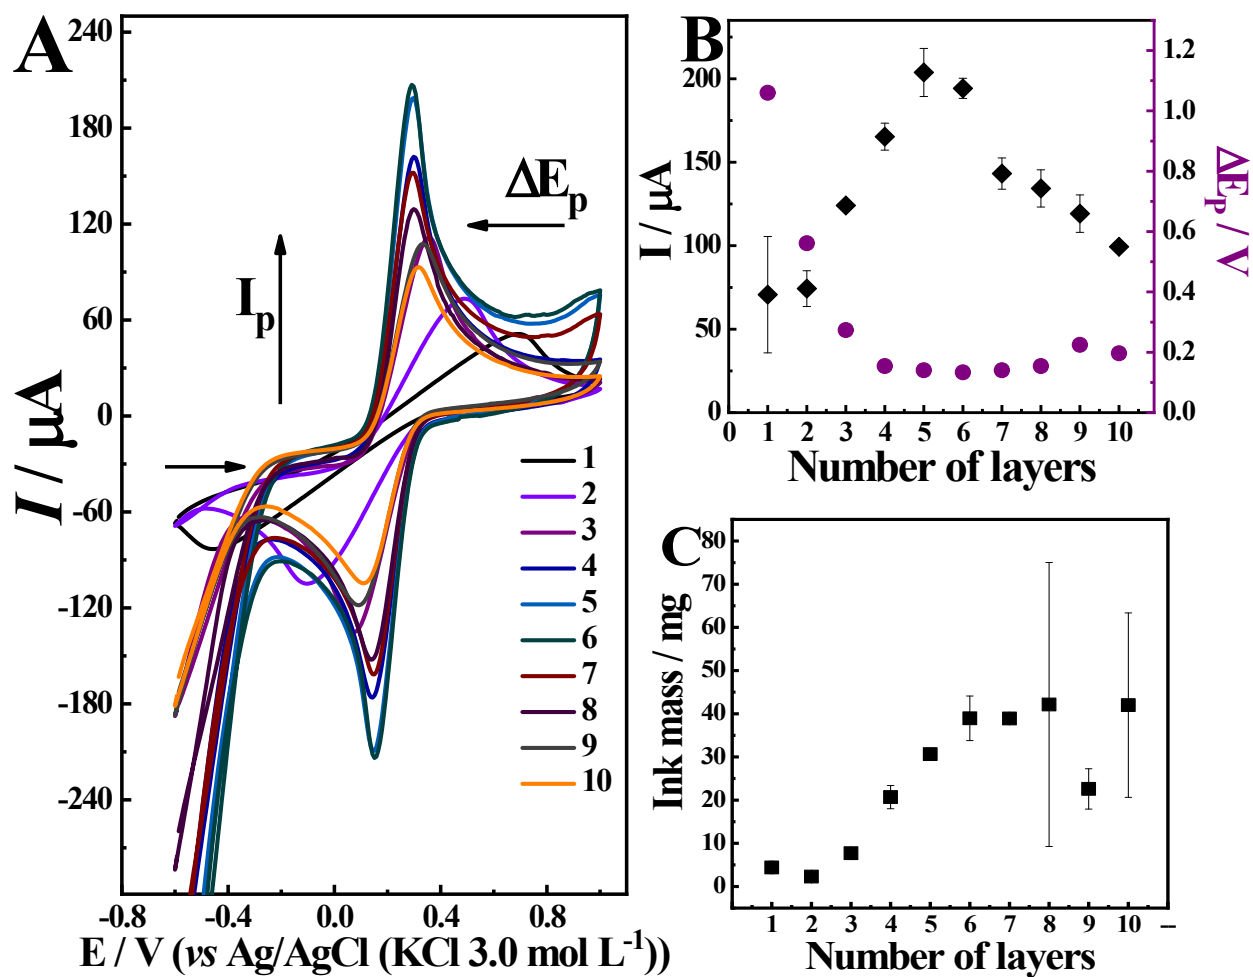

**Figure S2.** A) Cyclic voltammograms of DunkE covered with HMI varying from 1 to 10 layers recorded in  $5.0 \text{ mmol L}^{-1} [\text{Fe}(\text{CN})_6]^{4-}$  in  $\text{KCl}$  pH 3.0 at  $100 \text{ mV s}^{-1}$ . B) Anodic peak current and variation between peak potential as function of number of deposited layers. C) Final HMI mass as function of number of layers.

*Figure S3*

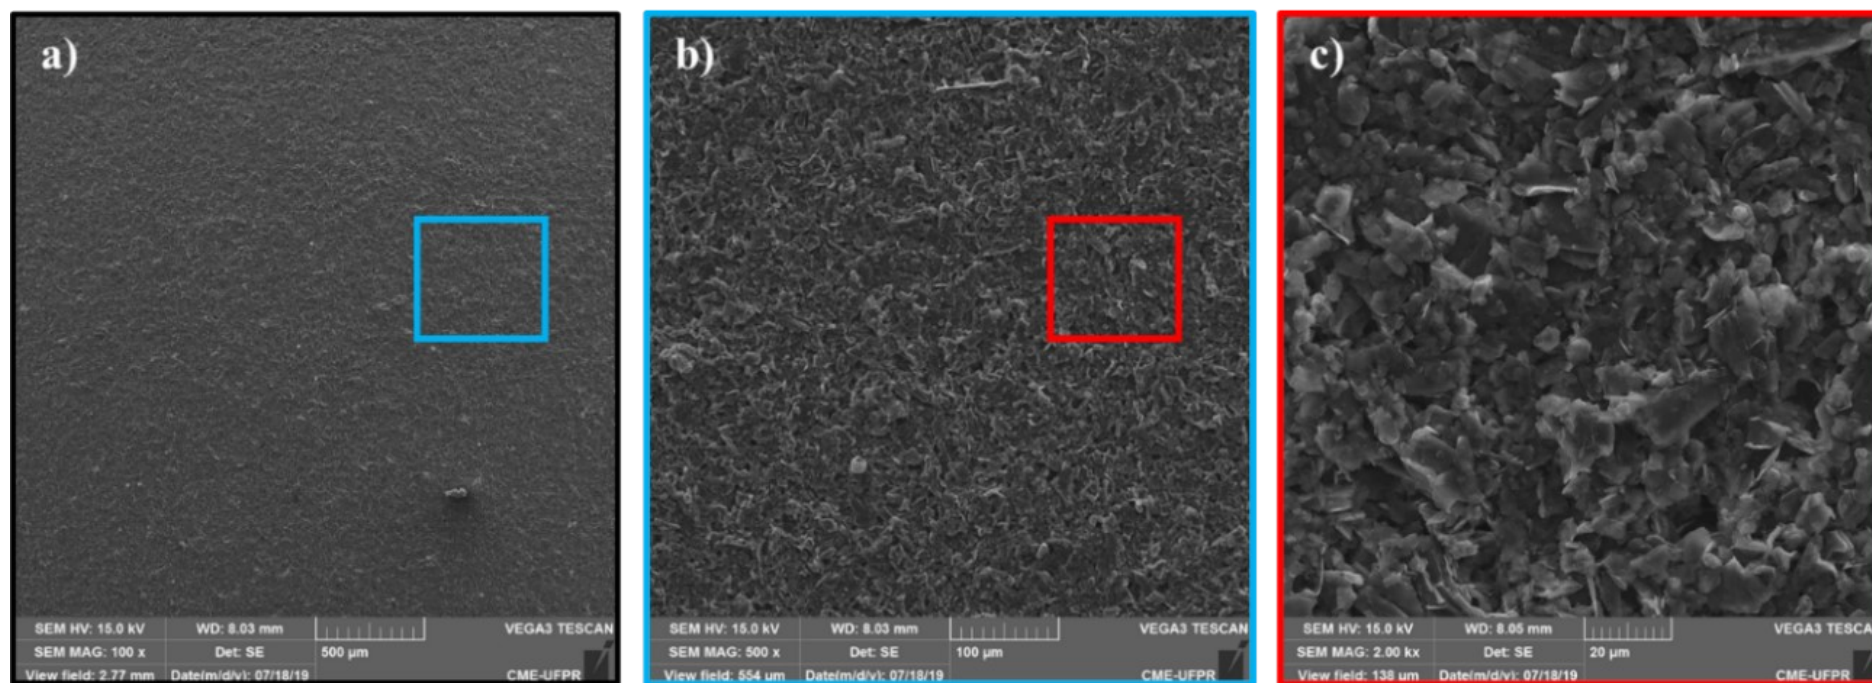

**Figure S3.** Representative images of scanning electronic microscopy (SEM) technique from optimized HMI graphite:nail polish (80:20) material.

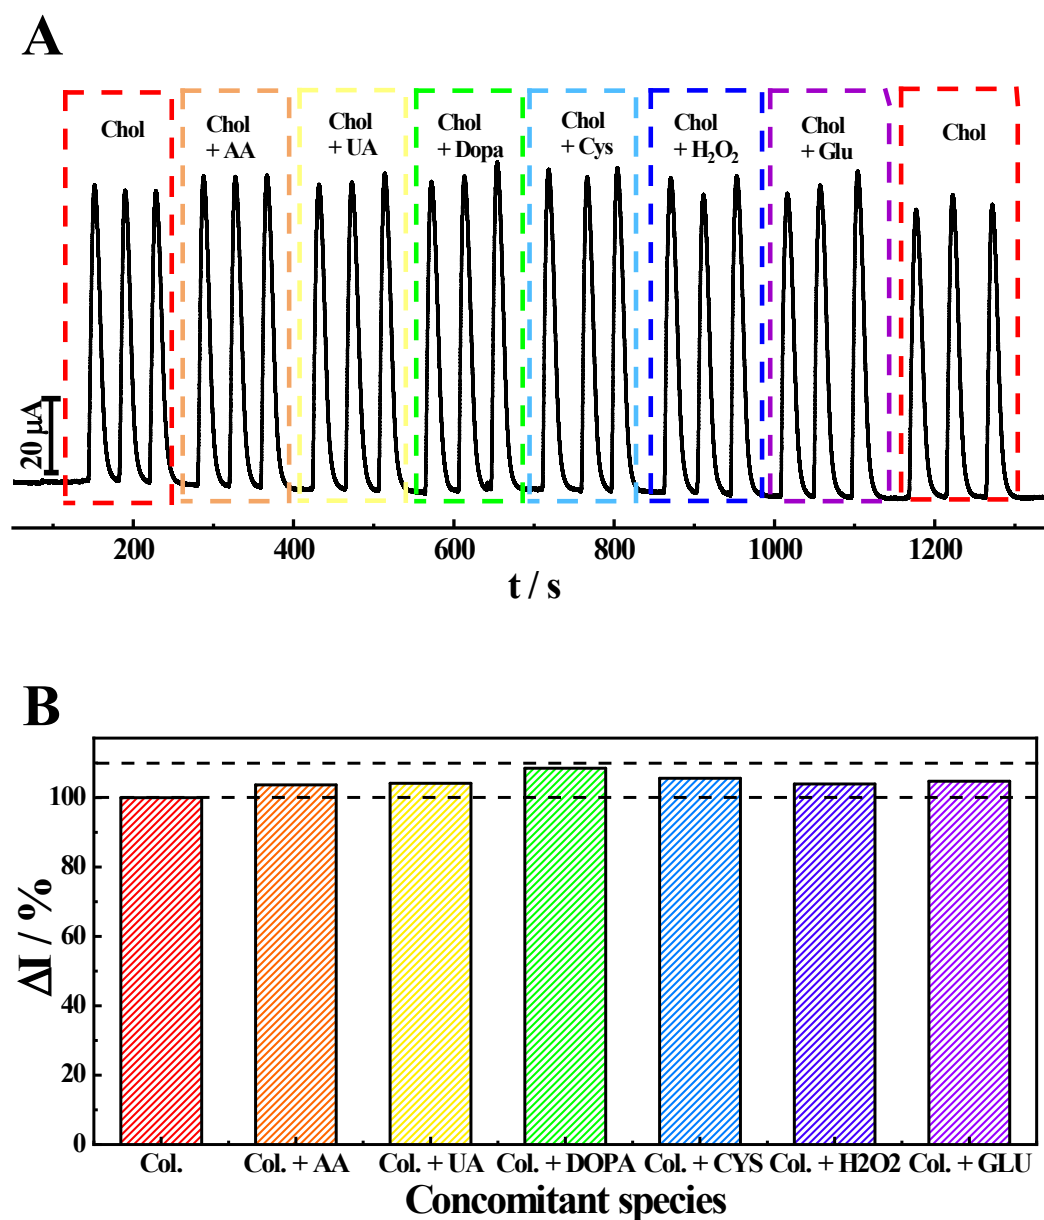

**Figure S4:** Potentially interfering concomitant species that potentially affect the sample analysis and their electrochemical responses. AA = ascorbic acid, UA = uric acid, DOPA = dopamine, CYS = cysteine, H<sub>2</sub>O<sub>2</sub> = hydrogen peroxide and GLU = glucose (A). Consecutive addition of CHOL 5.0  $\mu\text{mol L}^{-1}$  in equal concentrations of 5.0  $\mu\text{mol L}^{-1}$ , and superior concentration of 10.0  $\mu\text{mol L}^{-1}$  (B) of interferent species.
